# Supplementary material for: Development of Stereo NIR-II Fluorescence Imaging System for 3D Tumor Vasculature in Small Animals
Source: MDPI journal article supplement (doi:10.3390/bios12020085), 2022-01-30
Supplement: s1 [file s1]

## Supplementary Tables

**Supplementary Table S1. the detailed parameter sets of fluorescence imaging in this study**

| Figures                | Concentration | Laser<br>(mWcm <sup>-2</sup> ) | Optical Filter | Integration time (ms)            |
|------------------------|---------------|--------------------------------|----------------|----------------------------------|
| Figure 3c<br>(1100-LP) | 5 mg/ ml      | 25                             | 1100 LP        | <b>Supplementary<br/>Table 2</b> |
| Figure 3c<br>(1300-LP) | 5 mg/ ml      | 50                             | 1300 LP        |                                  |
| Figure 4a<br>(1100-LP) | 5 mg/ ml      | 50                             | 1100LP         | 1000                             |
| Figure 4a<br>(1300-LP) | 5 mg/ ml      | 50                             | 1300LP         | 1000                             |
| Figure 4a<br>(1400-LP) | 5 mg/ ml      | 50                             | 1400LP         | 1000                             |
| Figure 5b              | N/A           | N/A                            | N/A            | 1000                             |
| Figure 6a              | 5 mg/ ml      | 50                             |                | 1000                             |
| Figure 7b              | 5 mg/ ml      | 50                             |                | 1000                             |

**Supplementary Table S2. the integration time (ms) used for each fluorescence image of phantom study**

| Depth<br>(mm) | IR-TPE Pdots |         |
|---------------|--------------|---------|
|               | 1100-LP      | 1300-LP |
| 1             | 1000         | 1000    |
| 2             | 2000         | 2000    |
| 3             | 3000         | 3000    |
| 4             | 4000         | 4000    |
| 5             | 5000         | 5000    |
| 6             | 6000         | 6000    |
